# Supplementary material for: MultiEditR: The first tool for the detection and quantification of RNA editing from Sanger sequencing demonstrates comparable fidelity to RNA-seq
Source: PubMed Central journal article supplement — Mol Ther Nucleic Acids. 2021 Jul 21;25:515–23. doi: 10.1016/j.omtn.2021.07.008 (PMC8463291; doi:10.1016/j.omtn.2021.07.008), 2021-07-21
Supplement: mmc1.pdf [file mmc1.pdf]

## Supplemental information

**MultiEditR: The first tool for the detection and  
quantification of RNA editing from Sanger sequencing  
demonstrates comparable fidelity to RNA-seq**

**Mitchell G. Kluesner, Rafail Nikolaos Tasakis, Taga Lerner, Annette Arnold, Sandra Wüst, Marco Binder, Beau R. Webber, Branden S. Moriarity, and Riccardo Pecori**

## SUPPLEMENTARY MATERIALS

### pJET-CmAG-WT and pJET-CmAG-6x

CTCCCACAACGAGGACTACACCATCGTGGAACAGTACGAACGCGCCGAGGGCCGCC  
ACTCCACCGGCGGCATGGACGAGCTGTACAAGaagcttaAACAAGTAGCTGGTGCCAAG  
GAAAAAATAACTTCTTTCATGGAAAATTATAGAATTACAGATAATGATGTACTAATT  
GCCATAGATAGTGCCAAAATCAACTTCAATGAAAAA**C**TCTCTCAA**C**TTGAGACATA  
CGCGATA**C**AATTTGATCAGTATATTAAGATAATTATGATCCACATGAC**C**TTAAAAAG  
AA**C**TATTGCTGAGATTATTGAT**C**GAATCATTGAAAAGTTAAAAATTCTTGATGAACA  
GTATCATATCCGTGTAAATCTAGCAAAATCAATCCATAATCTCTATTTATTTGTTGAA  
AACGTTGATCTTAACCAAGTCAGTAGTAGTAACACCTCTTGGATCCAAAATGTGGAT  
TCCAATTATCAAGTCAGAATCCAAATTCAAGAAAACTACAGCAGCTCAGGACACA  
AATTCAGAATATAGACATTCAGCAGCTTGCTGCAGAGGTAAAACGACAG

In **yellow** are highlighted the 6 Cs which are unedited (C) in pJET-CmAG-WT and edited (T) in the pJET-CmAG-6x.

### mCherry-mApoB-eGFP (CmAG) coding region:

ATGGTGAGCAAGGGCGAGGAGGATAACATGGCCATCATCAAGGAGTTCATGCGCTT  
CAAGGTGCACATGGAGGGCTCCGTGAACGGCCACGAGTTCGAGATCGAGGGCGAGG  
GCGAGGGCCGCCCTACGAGGGCACCCAGACCGCCAAGCTGAAGGTGACCAAGGGT  
GGCCCCCTGCCCTTCGCCTGGGACATCCTGTCCCCTCAGTTCATGTACGGCTCCAAG  
GCCTACGTGAAGCACCCCGCCGACATCCCCGACTACTTGAAGCTGTCCTTCCCCGAG  
GGCTTCAAGTGGGAGCGCGTGATGAACTTCGAGGACGGCGGCGTGGTGACCGTGAC  
CCAGGACTCCTCCCTGCAGGACGGCGAGTTCATCTACAAGGTGAAGCTGCGCGGCA  
CCAACTTCCCCTCCGACGGCCCCGTAATGCAGAAGAAGACCATGGGCTGGGAGGCC  
TCCTCCGAGCGGATGTACCCCGAGGACGGCGCCCTGAAGGGCGAGATCAAGCAGAG  
GCTGAAGCTGAAGGACGGCGGCCACTACGACGCTGAGGTCAAGACCACCTACAAGG  
CCAAGAAGCCCGTGCAGCTGCCCGGCGCCTACAACGTCAACATCAAGTTGGACATC  
ACCTCCCACAACGAGGACTACACCATCGTGGAACAGTACGAACGCGCCGAGGGCCG  
CCACTCCACCGGCGGCATGGACGAGCTGTACAAGaagcttaAACAAGTAGCTGGTGCCA  
AGGAAAAAATAACTTCTTTCATGGAAAATTATAGAATTACAGATAATGATGTACTAA  
TTGCCATAGATAGTGCCAAAATCAACTTCAATGAAAAACTCTCTCAACTTGAGACAT  
ACGCGATACAATTTGATCAGTATATTAAGATAATTATGATCCACATGACTTAAAAA  
GAACTATTGCTGAGATTATTGATCGAATCATTGAAAAGTTAAAAATTCTTGATGAAC  
AGTATCATATCCGTGTAAATCTAGCAAAATCAATCCATAATCTCTATTTATTTGTTGA  
AAACGTTGATCTTAACCAAGTCAGTAGTAGTAACACCTCTTGGATCCAAAATGTGGA

TTCCAATTATCAAGTCAGAATCCAAATTCAAGAAAACTACAGCAGCTCAGGACAC  
AAATTCAGAATATAGACATTCAGCAGCTTGCTGCAGAGGTAAAACGACAGACCCGG  
GATCCACCGGTGCGCCACCATGGTGAGCAAGGGCGAGGAGCTGTTACCGGGGTGGT  
GCCATCCTGGTCGAGCTGGACGGCGACGTAAACGGCCACAAGTTCAGCGTGTCCG  
GCGAGGGCGAGGGCGATGCCACCTACGGCAAGCTGACCCTGAAGTTCATCTGCACC  
ACCGGCAAGCTGCCCCTGCCCTGGCCCACCCTCGTGACCACCCTGACCTACGGCGTG  
CAGTGCTTCAGCCGCTACCCCGACCACATGAAGCAGCACGACTTCTTCAAGTCCGCC  
ATGCCCCGAAGGCTACGTCCAGGAGCGCACCATCTTCTTCAAGGACGACGGCAACTA  
CAAGACCCGCGCCGAGGTGAAGTTCGAGGGCGACACCCTGGTGAACCGCATCGAGC  
TGAAGGGCATCGACTTCAAGGAGGACGGCAACATCCTGGGGCACAAGCTGGAGTAC  
AACTACAACAGCCACAACGTCTATATCATGGCCGACAAGCAGAAGAACGGCATCAA  
GGTGAACTTCAAGATCCGCCACAACATCGAGGACGGCAGCGTGCAGCTCGCCGACC  
ACTACCAGCAGAACCCCCATCGGCGACGGCCCCGTGCTGCTGCCCGACAACCAC  
TACCTGAGCACCCAGTCCGCCCTGAGCAAAGACCCCAACGAGAAGCGCGATCACAT  
GGTCCTGCTGGAGTTCGTGACCGCCGCCGGGATCACTCTCGGCATGGACGAGCTGTA  
CAAGTAA

In red mCherry, in yellow mouse Apob and in green eGFP.

**mCherry-Apob-eGFP W58X (CAGX) coding region:**

ATGGTGAGCAAGGGCGAGGAGGATAACATGGCCATCATCAAGGAGTTCATGCGCTT  
CAAGGTGCACATGGAGGGCTCCGTGAACGGCCACGAGTTCGAGATCGAGGGCGAGG  
GCGAGGGCCGCCCTACGAGGGCACCCAGACCGCCAAGCTGAAGGTGACCAAGGGT  
GGCCCCCTGCCCTTCGCCTGGGACATCCTGTCCCCTCAGTTCATGTACGGCTCCAAG  
GCCTACGTGAAGCACCCCGCCGACATCCCCGACTACTTGAAGCTGTCCTTCCCCGAG  
GGCTTCAAGTGGGAGCGCGTGATGAACTTCGAGGACGGCGGGCGTGGTGACCGTGAC  
CCAGGACTCCTCCCTGCAGGACGGCGAGTTCATCTACAAGGTGAAGCTGCGCGGCA  
CCAACTTCCCCTCCGACGGCCCCGTAATGCAGAAGAAGACCATGGGCTGGGAGGCC  
TCCTCCGAGCGGATGTACCCCGAGGACGGCGCCCTGAAGGGCGAGATCAAGCAGAG  
GCTGAAGCTGAAGGACGGCGGCCACTACGACGCTGAGGTCAAGACCACCTACAAGG  
CCAAGAAGCCCGTGCAGCTGCCCGGCGCCTACAACGTCAACATCAAGTTGGACATC  
ACCTCCCACAACGAGGACTACACCATCGTGGAACAGTACGAACGCGCCGAGGGCCG  
CCACTCCACCGGCGGCATGGACGAGCTGTACAAGAAGCTTACCATGGCCAAGGAGA  
AACTGACTGCTCTCACAAAAAAGTATAGAATTACAGAAAATGATATACAAATTGCA  
TTAGATGATGCCAAAATCAACTTTAATGAAAACTATCTCAACTGCAGACATATATG  
ATACAATTTGATCAGTATATTAAAGATAGTTATGATTTACATGATTTGAAAATAGCT  
ATTGCTAATATTATTGATGAAATCATTGAAAAATTA AAAAGTCTTGATGAGCACTAT  
CATATCCGTGTA AATTTAGTAAAAACAATCCATGATCTACATTTGTTTATTGAAAAT  
ATTGATTTTAACAAAAGTGGAAGTAGTACTGCATCCTGGATTCAAAAATGTGGATACT

AAGTACCAAATCAGAATCCAGATACAAGAAAACTGCAGCAGCTTAAGAGACACAT  
ACAGAATATAGACATCCAGCACCTAGCTGGAATTCTGCAGTCGACGGTACCGCGGG  
CCCGGGATCCACCGGTCGCCACCATGGTGAGCAAGGGCGAGGAGCTGTTACCGGG  
GTGGTGCCCATCCTGGTCGAGCTGGACGGCGACGTAAACGGCCACAAGTTCAGCGT  
GTCCGGCGAGGGCGAGGGCGATGCCACCTACGGCAAGCTGACCCTGAAGTTCATCT  
GCACCACCGGCAAGCTGCCCGTGCCCTAGGCCACCCTCGTGACCACCCTGACCTACG  
GCGTGCAGTGCTTCAGCCGCTACCCCGACCACATGAAGCAGCACGACTTCTTCAAGT  
CCGCCATGCCC GAAGGCTACGTCCAGGAGCGCACCATCTTCTTCAAGGACGACGGC  
AACTACAAGACCCGCGCCGAGGTGAAGTTCGAGGGCGACACCCTGGTGAACCGCAT  
CGAGCTGAAGGGCATCGACTTCAAGGAGGACGGCAACATCCTGGGGCACAAGCTGG  
AGTACA ACTACAACAGCCACAACGTCTATATCATGGCCGACAAGCAGAAGAACGGC  
ATCAAGGTGAACTTCAAGATCCGCCACAACATCGAGGACGGCAGCGTGCAGCTCGC  
CGACCACTACCAGCAGAACACCCCATCGGCGACGGCCCCGTGCTGCTGCCCGACA  
ACCACTACCTGAGCACCCAGTCCGCCCTGAGCAAAGACCCCAACGAGAAGCGCGAT  
CACATGGTCCTGCTGGAGTTCGTGACCGCCGCCGGGATCACTCTCGGCATGGACGAG  
CTGTACAAGTAA

In red mCherry, in yellow human Apob and in green eGFP. In light blue is highlighted W58X mutation and in red the A to edit to G to re-activate the eGFP.

## SUPPLEMENTARY TABLES

**Supplementary Table 1 - List of all the regions within transcripts analysed with REDIttools v1 for NGS comparison with MultiEditR.** For each transcript strandness, reference genome and chromosomal coordinates of the amplicon are indicated.

| <b>Gene (strand)</b> | <b>Reference Genome</b> | <b>Chromosomal coordinates of the amplicon</b> |
|----------------------|-------------------------|------------------------------------------------|
| ARSD (reg.1) (-)     | hg19                    | chrX:2,824,741-2,825,282                       |
| ARSD (reg.2) (-)     | hg19                    | chrX:2,824,114-2,824,494                       |
| CTSS (-)             | hg19                    | chr1:150,704,237-150,704,783                   |
| DDX58 (-)            | hg19                    | chr9:32,455,300-32,502,734                     |
| MAVS (+)             | hg19                    | chr20:3,827,446-3,856,770                      |
| SSR3 (-)             | hg19                    | chr3:156,257,929-156,272,973                   |
| Slc39a10 (-)         | mm10                    | chr1:46,807,710-46,808,199                     |
| Aldoc (+)            | mm10                    | chr11:78,327,206-78,327,625                    |
| Atp6ap2 (+)          | mm10                    | chrX:12,615,885-12,616,656                     |
| Serinc1 (-)          | mm10                    | chr10:57,515,845-57,516,141                    |
| B2m (+)              | mm10                    | chr2:122,147,686-122,153,083                   |
| Rab7 (-)             | mm10                    | chr6:87,999,398-87,999,968                     |
| Reep5 (-)            | mm10                    | chr18:34,346,596-34,347,035                    |
| Casp6 (+)            | mm10                    | chr3:129,913,560-129,914,011                   |

**Supplementary Table 2 - List of all the regions within transcripts analysed by Amplicon-seq.**  
 For each transcript strandness, reference genome and chromosomal coordinates of the amplicon are indicated.

| <b>Gene (strand)</b> | <b>Reference Genome</b> | <b>Chromosomal coordinates of the amplicon</b> |
|----------------------|-------------------------|------------------------------------------------|
| ARSD (-)             | hg19                    | chrX:2824741-2825282                           |
| CTSS (-)             | hg19                    | chr1:150704237-150704783                       |
| DDX58 (-)            | hg19                    | chr9:32456205-32456648                         |
| MAVS (+)             | hg19                    | chr20:3851441-3851945                          |
| Slc39a10 (-)         | mm10                    | chr1:46807710-46808199                         |
| Aldoc (+)            | mm10                    | chr11:78327206-78327625                        |
| Atp6ap2 (+)          | mm10                    | chrX:12616190-12616656                         |
| Serinc1 (-)          | mm10                    | chr10:57515845-57516325                        |
| B2m (+)              | mm10                    | chr2:122152650-122153068                       |
| Rab7 (-)             | mm10                    | chr6:87999398-87999968                         |

**Supplementary Table 3 - List of all the primers and oligos used in this study.** For all the primers and oligos listed above lowercase bases represent the homology part needed during the cloning (#1-8, 17) or the adaptor sequence needed for Amplicon-seq (#57-76). For oligos #13-14 the base in bold is the one modified during the site-directed mutagenesis. In oligo #17 gRNA the bases highlighted in green codify the boxB hairpin. Oligos #27-56 were used to generate the PCR fragments used in the comparison of MultiEditR and NGS methods (Figure 2 and S4).

|   |                                        |                                                        |
|---|----------------------------------------|--------------------------------------------------------|
| 1 | mApob_F                                | ggcggcatggacgagctgtacaagAAGCTTAAACAAGTAGCTGGTGCCAAGGAA |
| 2 | mApob_R                                | accatggtggcgaccggtggatccccgggCTGTTCGTTTTACCTCTGCAGCAAG |
| 3 | RBM47_F                                | ttagtgaaccgtcagatccgctagcATGACTGCTGAAGATTCCGCC         |
| 4 | RBM47_R                                | agagtgcggccgcttactgtacaTCAGTAAGTCTGGTAGACGTCG          |
| 5 | CRISPR<br>sgRNA<br>ADAR1ko_<br>exon4_F | caccGGACAGGAGACGGAATTCGC                               |
| 6 | CRISPR<br>sgRNA<br>ADAR1ko_<br>exon4_R | aaacGCGAATTCCGTCTCCTGTCC                               |
| 7 | non-<br>targeting<br>sgRNA_F           | caccGTATTACTGATATTGGT                                  |
| 8 | non-<br>targeting<br>sgRNA_R           | aaacACCAATATCAGTAATAC                                  |
| 9 | A1KO_11_f<br>w                         | CACCGAGCAAGATGAGTTCCGAGAC                              |

|    |                     |                                                                                                                                  |
|----|---------------------|----------------------------------------------------------------------------------------------------------------------------------|
| 10 | A1KO_11_r<br>v      | AAACGTCTCGGAACTCATCTTGCTC                                                                                                        |
| 11 | A1KO_39_f<br>w      | CACCGTAGCTGTTGATCCCCTCTG                                                                                                         |
| 12 | A1KO_39_r<br>v      | AAACCAGAGTGGGATCAACAGCTAC                                                                                                        |
| 13 | W58X_uAg<br>_F      | CTGCCCCGTGCCCTAGCCCACCCT                                                                                                         |
| 14 | W58X_uAg<br>_R      | AGGGTGGGCTAGGGCACGGGCAG                                                                                                          |
| 15 | pENTR_pla<br>sm_F   | TTTTTCTAGACCCAGCTTTCTTGTA                                                                                                        |
| 16 | pENTR_pla<br>sm_R   | GGTGTTCGTCCTTTCCACA                                                                                                              |
| 17 | Oligo_gRN<br>A_W58X | tggaaaggacgaaacaccTCAGGGTGGTGGCCCTGAAAAAGGGCCGAGGGTGGG<br>CCAGGGCACGGGCAGCTTGC GGCCCTGAAAAAGGGCC TGGTGCAGATtt<br>tttctagaccagctt |
| 18 | Apob_F              | TGCATCCTGGATTCAAAATGTGG                                                                                                          |
| 19 | eGFP_R              | TTGAAGTCGATGCCCTTCAG                                                                                                             |
| 20 | A1_KO1A_<br>fw      | CATTGATGGCTCTGTGGGTGTTC                                                                                                          |
| 21 | A1_KO1A_<br>rv      | GCTGAAAAGCACCCAGGGAC                                                                                                             |
| 22 | A1_KO2A_<br>fw      | GTACCTCTCAGATCCTTTGAGAAGTC                                                                                                       |



|    |                                |                             |
|----|--------------------------------|-----------------------------|
| 23 | A1_KO2A_<br>rv                 | GCATGCTGTAACCCTGTAGTTC      |
| 24 | B2m_fw                         | CAAGCATCATGATGCTCTGAAG      |
| 25 | B2m_rv                         | GTAAAAGTAACAAAAGCAGAAGTAGCC |
| 26 | mCherry-<br>mApob-<br>eGFP_SEQ | CTCCCACAACGAGGACTACACC      |
| 27 | MAVS_F                         | TACCCTGCCTGGCCTCAAACCTATTA  |
| 28 | MAVS_R                         | ACTTCATGCTGTCTGGGAGCAA      |
| 29 | DDX58_F                        | ATTTGGCCCTGTTGAGCACTCT      |
| 30 | DDX58_R                        | ACGTCCAGGAAACCGCAAACCTA     |
| 31 | SSR3_F                         | TGGGCTCCATGCAAGAAGCTTGGAA   |
| 32 | SSR3_R                         | GCACTGCCATCTAGTGGCAAGTTT    |
| 33 | ARSD_reg1<br>_F                | GAGCCTGACTGCGTTGCAAACAAA    |
| 34 | ARSD_reg1<br>_R                | AAGACGGAGGGGTGAAAACATCG     |
| 35 | ARSD_reg2<br>_F                | CACCCCTCCGTCTTAAAGCATTGT    |

|    |             |                             |
|----|-------------|-----------------------------|
| 36 | ARSD_reg2_R | CCCTTGATCGGCTCATTACTTGGGA   |
| 37 | CTSS_F      | CTGGTGATGGGGTTTAGCAACT      |
| 38 | CTSS_R      | TGCCAAATAAAGGCCCTGGTCA      |
| 39 | Aldoc_F     | AAGGGCTATGACCCACTTCCATGT    |
| 40 | Aldoc_R     | CGATTCCAATTCGAGCGATTGAGG    |
| 41 | Atp6ap2_F   | GCTAGACTTAGACAACAGGTTTGG    |
| 42 | Atp6ap2_R   | GTCTACAGATTGAAGCCATACCAC    |
| 43 | B2m_F       | CAAGCATCATGATGCTCTGAAG      |
| 44 | B2m_R       | GTAAAAGTAACAAAAGCAGAAGTAGCC |
| 45 | Casp6_F     | AACCTAGCAAGTAGGGCCATCTGT    |
| 46 | Casp6_R     | CATGACCAAGTCAAATAGGCCAC     |
| 47 | Cd36_F      | CTGGCTACATCTTTGGTAAAGCCG    |
| 48 | Cd36_R      | GGGCCACCCAGTCATGATAG        |
| 49 | Rab7_F      | TCCGTTCTGAGCAGGCTGTTTTGT    |

|    |                 |                                                            |
|----|-----------------|------------------------------------------------------------|
| 50 | Rab7_R          | TCTGGTGGGTTCTCCTTTCTCTT                                    |
| 51 | Reep5_F         | GCCTTGGAAGCTTCCCGCTGTATT                                   |
| 52 | Reep5_R         | GTCTCCCTTCTCAGGTCACAGGT                                    |
| 53 | Serinc1_F       | TGTATCGCTGCTGTCCAGCAT                                      |
| 54 | Serinc1_R       | GGCTGGAACATGAAGATGAACTGC                                   |
| 55 | Slc39a10_F      | ACTGCGGGAATATACTCCCACTCT                                   |
| 56 | Slc39a10_R      | GCAAGTATCACCTTGCAGGACCAT                                   |
| 57 | ARSD_NG<br>S_F  | tcgtcggcagcgtcagatgtgtataagagacagGAGCCTGACTGCGTTGCAAACAAA  |
| 58 | ARSD_NG<br>S_R  | gtctcgtgggctcggagatgtgtataagagacagAAGACGGAGGGGTGAAAACATCG  |
| 59 | CTSS_NGS<br>_F  | tcgtcggcagcgtcagatgtgtataagagacagCTGGTGATGGGGTTTAGCAACT    |
| 60 | CTSS_NGS<br>_R  | gtctcgtgggctcggagatgtgtataagagacagTGCCAAATAAAGGCCCTGGTCA   |
| 61 | DDX58_N<br>GS_F | tcgtcggcagcgtcagatgtgtataagagacagATTTGGCCCTGTTGAGCACTCT    |
| 62 | DDX58_N<br>GS_R | gtctcgtgggctcggagatgtgtataagagacagGAGAACAATGGCACACGTTAAGAG |
| 63 | MAVS_<br>NGS_F  | tcgtcggcagcgtcagatgtgtataagagacagCCATGAGCCCATCACCCAAC      |

|    |                 |                                                                   |
|----|-----------------|-------------------------------------------------------------------|
| 64 | MAVS_ NGS_R     | gtctcgtgggctcggagatgtgtataagagacagACTTCATGCTGTCTGGGAGCAA          |
| 65 | Slc39a10_N GS_F | tcgtcggcagcgtcagatgtgtataagagacagACTGCGGAATATACTCCCCTCT           |
| 66 | Slc39a10_N GS_R | gtctcgtgggctcggagatgtgtataagagacagGCAAGTATCACCTTGCAGGACCAT        |
| 67 | Aldoc_NGS _F    | tcgtcggcagcgtcagatgtgtataagagacagAAGGGCTATGACCCACTTCCATGT         |
| 68 | Aldoc_NGS _R    | gtctcgtgggctcggagatgtgtataagagacagCGATTCCAATTCGAGCGATTGAGG        |
| 69 | Atp6ap2_N GS_F  | tcgtcggcagcgtcagatgtgtataagagacagGGAGAACGCACTGGGTTTCTTA           |
| 70 | Atp6ap2_N GS_R  | gtctcgtgggctcggagatgtgtataagagacagGTCTACAGATTGAAGCCATAACCAC       |
| 71 | Serinc1_NG S_F  | tcgtcggcagcgtcagatgtgtataagagacagAGGCTCGGGTTAGGCACTAAGATA         |
| 72 | Serinc1_NG S_R  | gtctcgtgggctcggagatgtgtataagagacagGGCTGGAACATGAAGATGAACTGC        |
| 73 | B2m_NGS_ F      | tcgtcggcagcgtcagatgtgtataagagacagcaagcatcatgatGCTCTGAAG           |
| 74 | B2m_NGS_ R      | gtctcgtgggctcggagatgtgtataagagacagGTAAAAGTAACAAAAGCAGAAGTAGC<br>C |
| 75 | Rab7_NGS _F     | tcgtcggcagcgtcagatgtgtataagagacagTCCGTTCTGAGCAGGCTGTTTTGT         |
| 76 | Rab7_NGS _R     | gtctcgtgggctcggagatgtgtataagagacagTCTGGTGGGTTCTCCTTTCCTCTT        |

## SUPPLEMENTARY FIGURES

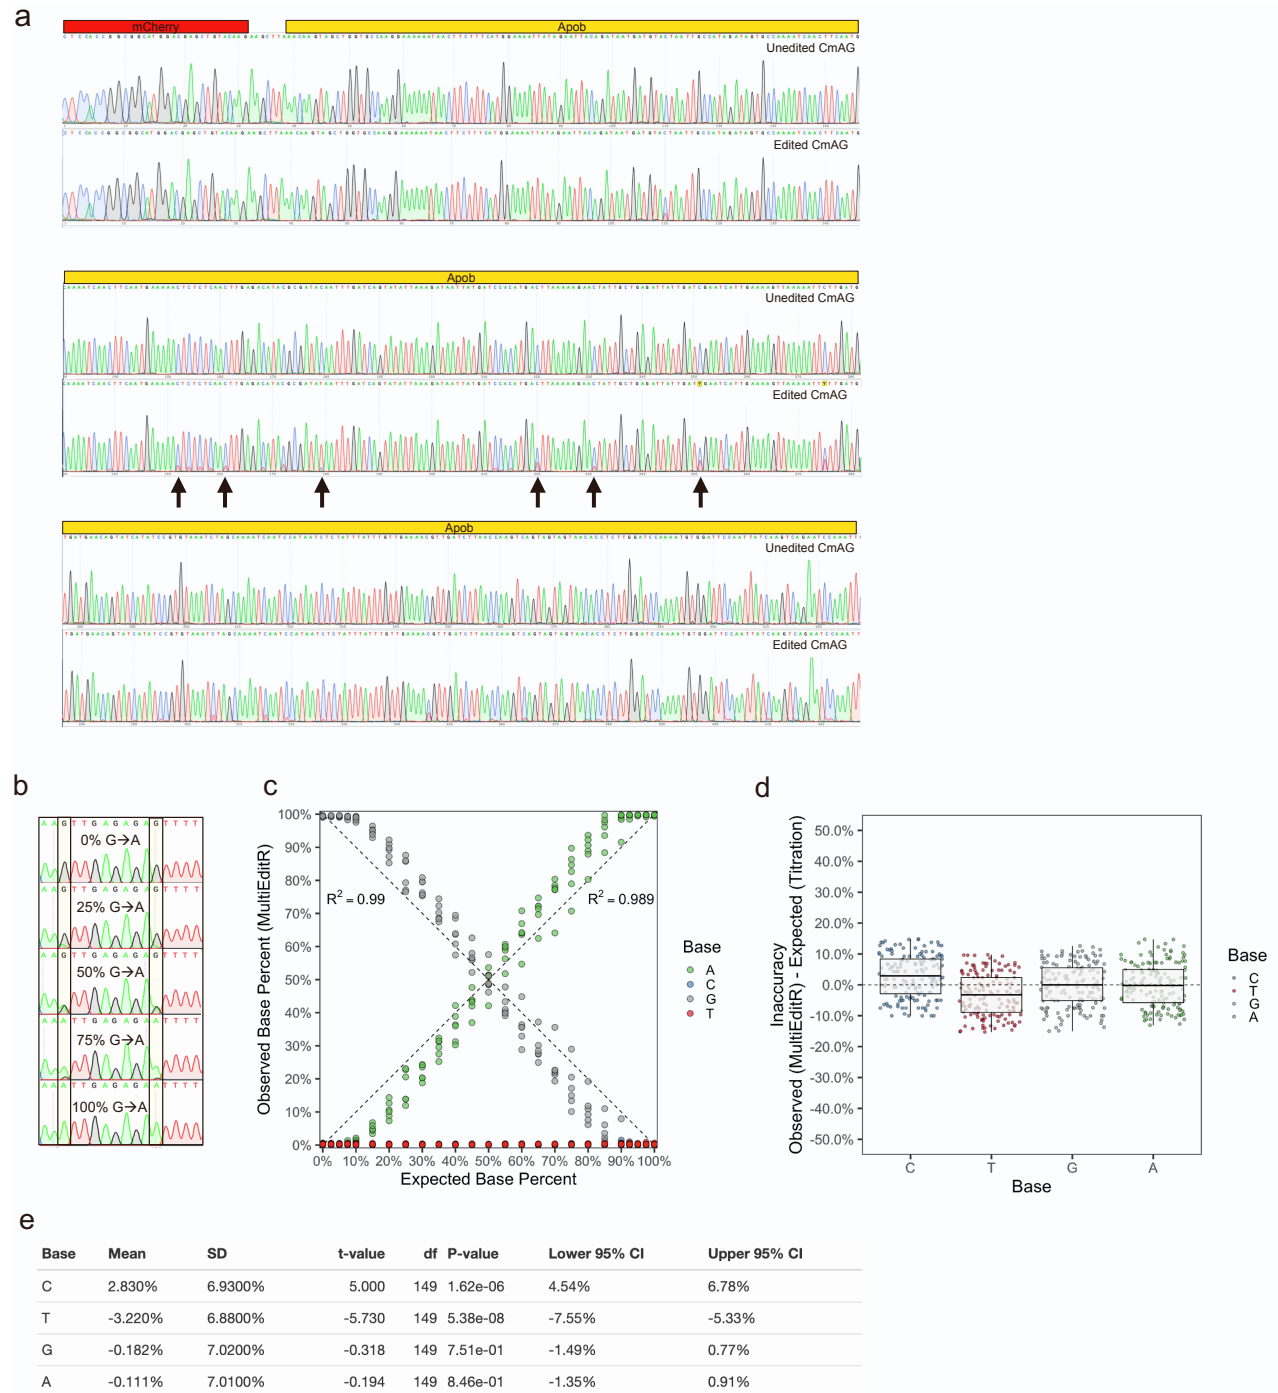

**Fig. S1 | C-to-U editing of Apob by APOBEC1 within CmAG plasmid.**

**a**, Sanger sequencing chromatograms from HEK293T cells transfected only with CmAG or with CmAG, APOBEC1 and RBM47. Amplification of Apob region from CmAG transcript and

following Sanger sequencing show abundant C-to-T editing in several sites along the sequenced area. Black arrows point to the 6 Cs which are unedited (C) in pJET-CmAG-WT and edited (T) in the pJET-CmAG-6x (Supplementary materials and Fig. 1a). **b**, Chromatograms from G-to-A titration showing a change in peak height at two sites. **c**, Titration of pJET-CmAG-WT with pJET-CmAG-6x sequenced with the forward primer, coefficient of determination was calculated relative to the identity line  $y = x$ ,  $N = 6$  sites per chromatogram. **d**, Inaccuracy of MultiEditR relative to expected titration values, significance was determined using Student's one-sample t-test relative to an inaccuracy of 0%. **e**, Table of results from Student's one-sample t-test of inaccuracies.

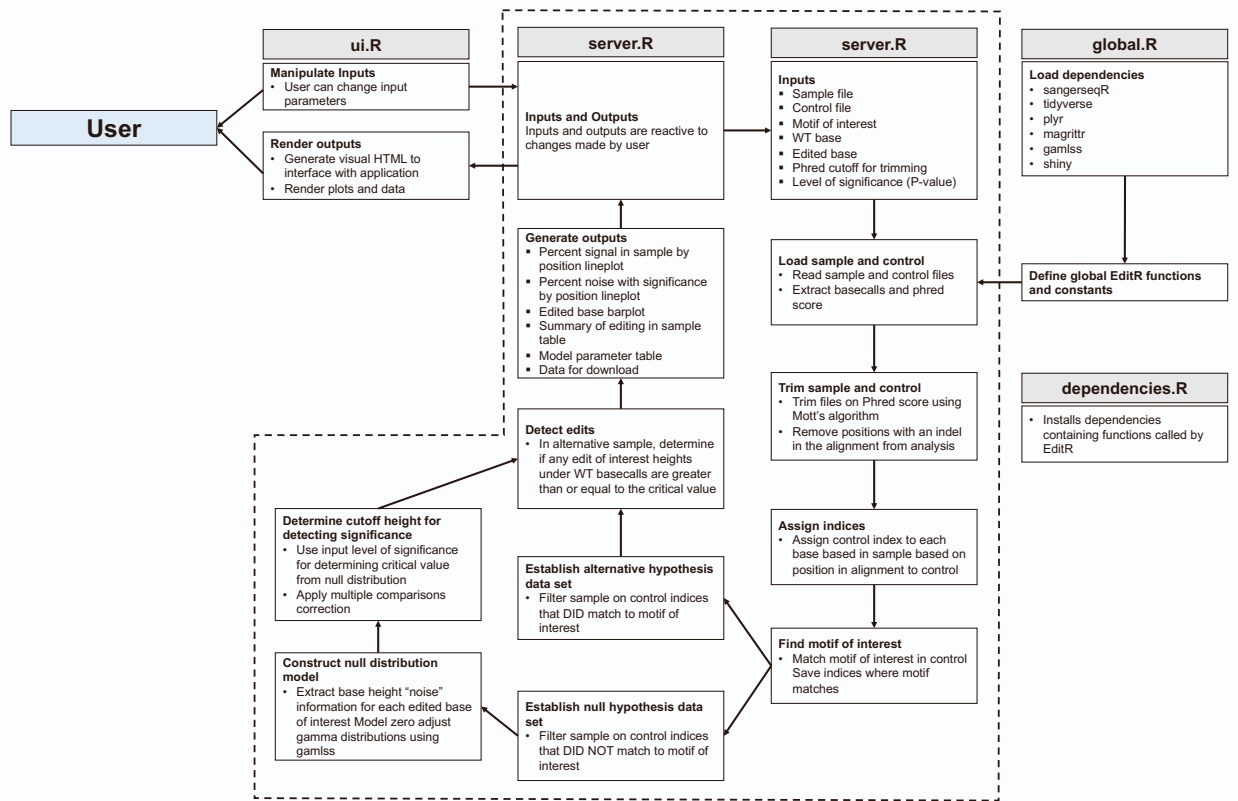

**Fig. S2 | MultiEditR algorithm.**

MultiEditR algorithm flow chart in the context of the MultiEditR web application made using R Shiny (z.umn.edu/multieditr). Source code available at:

<https://github.com/MoriarityLab/MultiEditR>

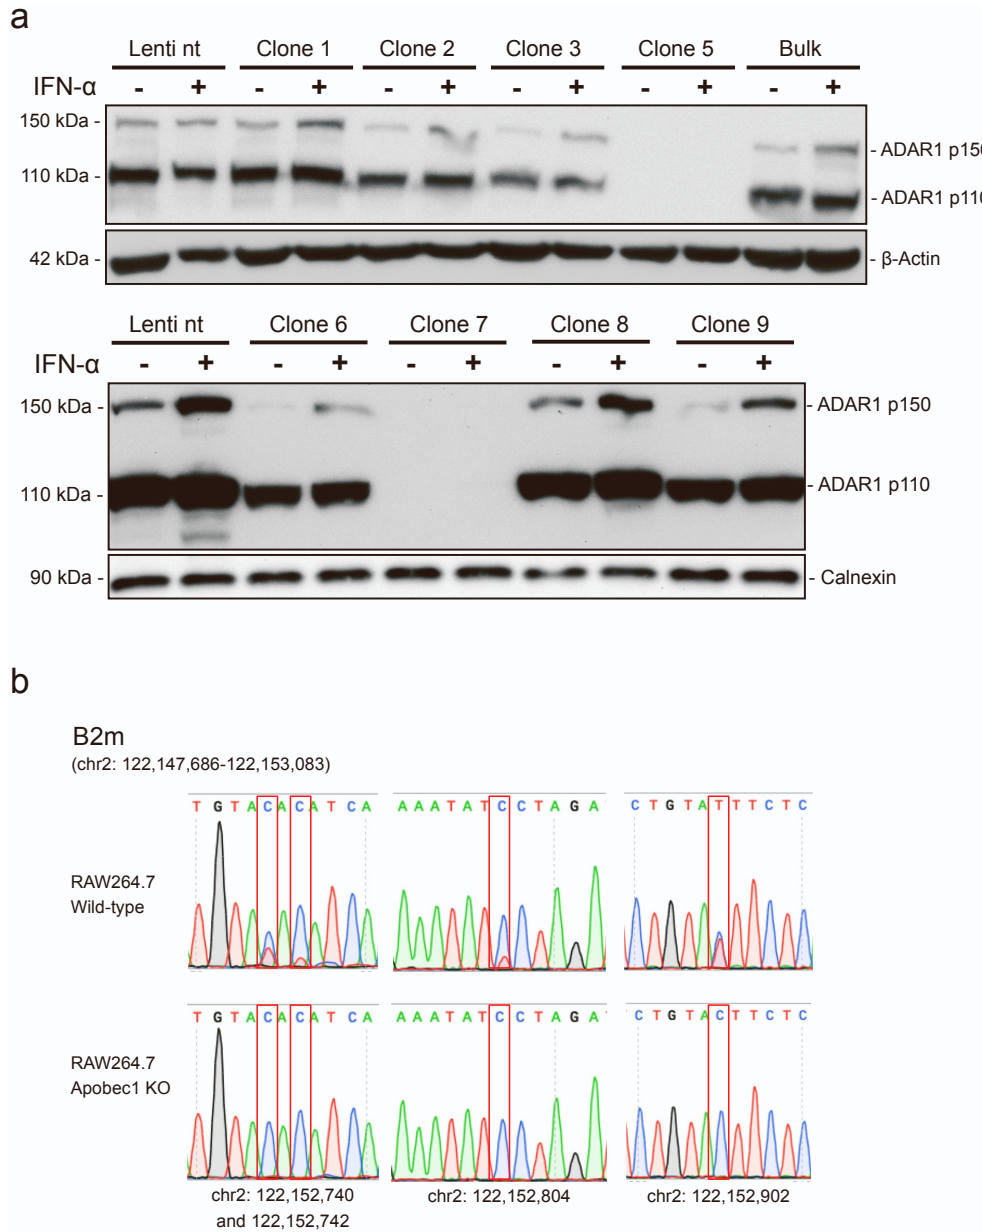

**Fig. S3 | Generation of human ADAR1 and murine APOBEC1 KO cell lines.**

**a**, Western blot of A549 KO clones and bulk, after transduction with lenti-CRISPR-ADAR1 exon 4. A549 cells were stimulated with 200 U/ml of IFN- $\alpha$  (pbl assay science, cat. no.#11100-1) for 16 h to evaluate the presence of ADAR1 p150. “Lenti nt” is the non-targeting control and was generated by transducing cells with the same vector (LentiCRISPRv2) but containing a non-targeting sgRNA (see Supplementary Table 3).  $\beta$ -Actin and Calnexin were used as loading controls



(Mouse  $\beta$ -Actin monoclonal antibody, Sigma-Aldrich, cat. no.#A5441; Rabbit Calnexin polyclonal antibody, Enzo Life science, cat. no.#ADI-SPA-865-F). **b**, Sanger sequencing chromatograms for RAW 264.7 wild-type and APOBEC1 knock-out after RT-PCR amplification of B2m 3'UTR region (oligos #24-25). The complete absence of C-to-U editing along the sequenced region confirms the deficiency of APOBEC1 editing activity within the knock-out clone.

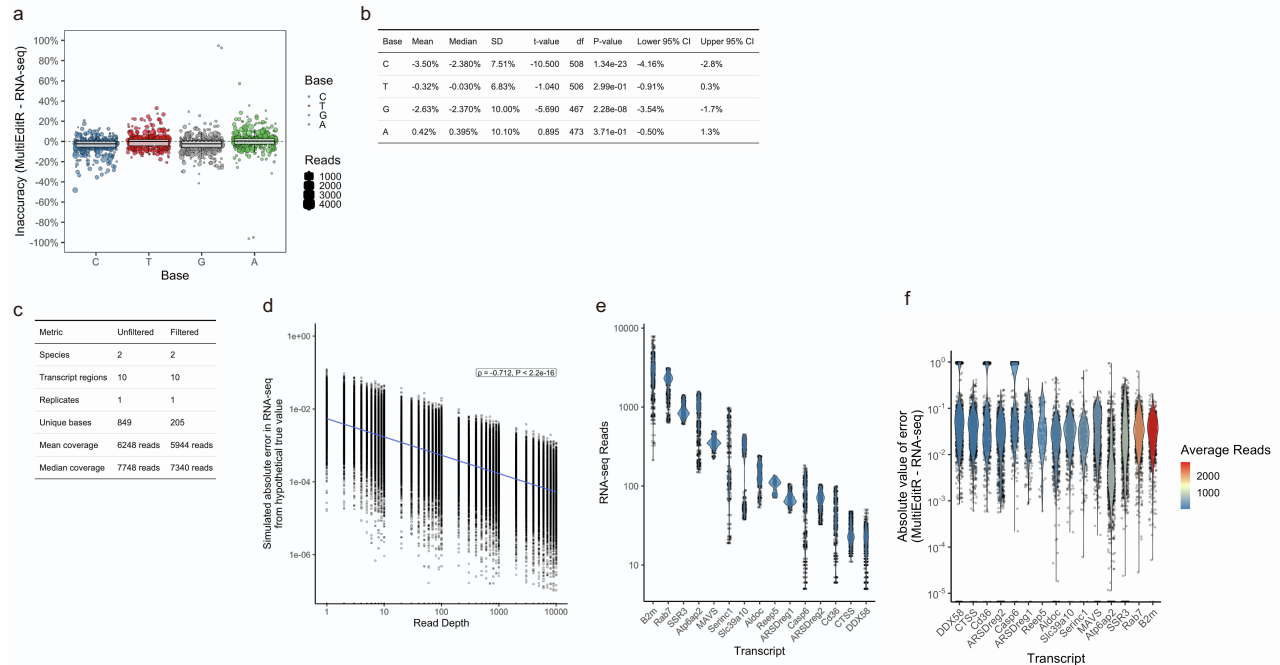

**Fig. S4 | Descriptive statistics, coverage and error of samples in RNA-seq data set.**

**a-b**, Comparison of MultiEditR to RNA-seq measurements. All data is filtered on between 1% and 99% editing measured by either method. Coefficients of determination represent regression to the identity line. Dot size is proportional to read coverage at the base of interest in RNA-seq. Tables represent results of Student's pairwise t-test between measurement methods. **c**, Descriptive statistics of samples in RNA-seq data set. **d**, Simulation of expected absolute error in RNA-seq editing value from true editing value as a function of read depth. Absolute error of editing measurement is negatively correlated with read depth (Spearman's correlation coefficient,  $\rho = -0.712, P < 2.2e-16$ ). **e**, Violin plots of read depth at each base for each transcript analyzed. **f**, Violin plots of absolute value of error in MultiEditR editing measurement minus REDIttools RNA-seq editing measurement by each transcript. Plots are colored by average read depth.

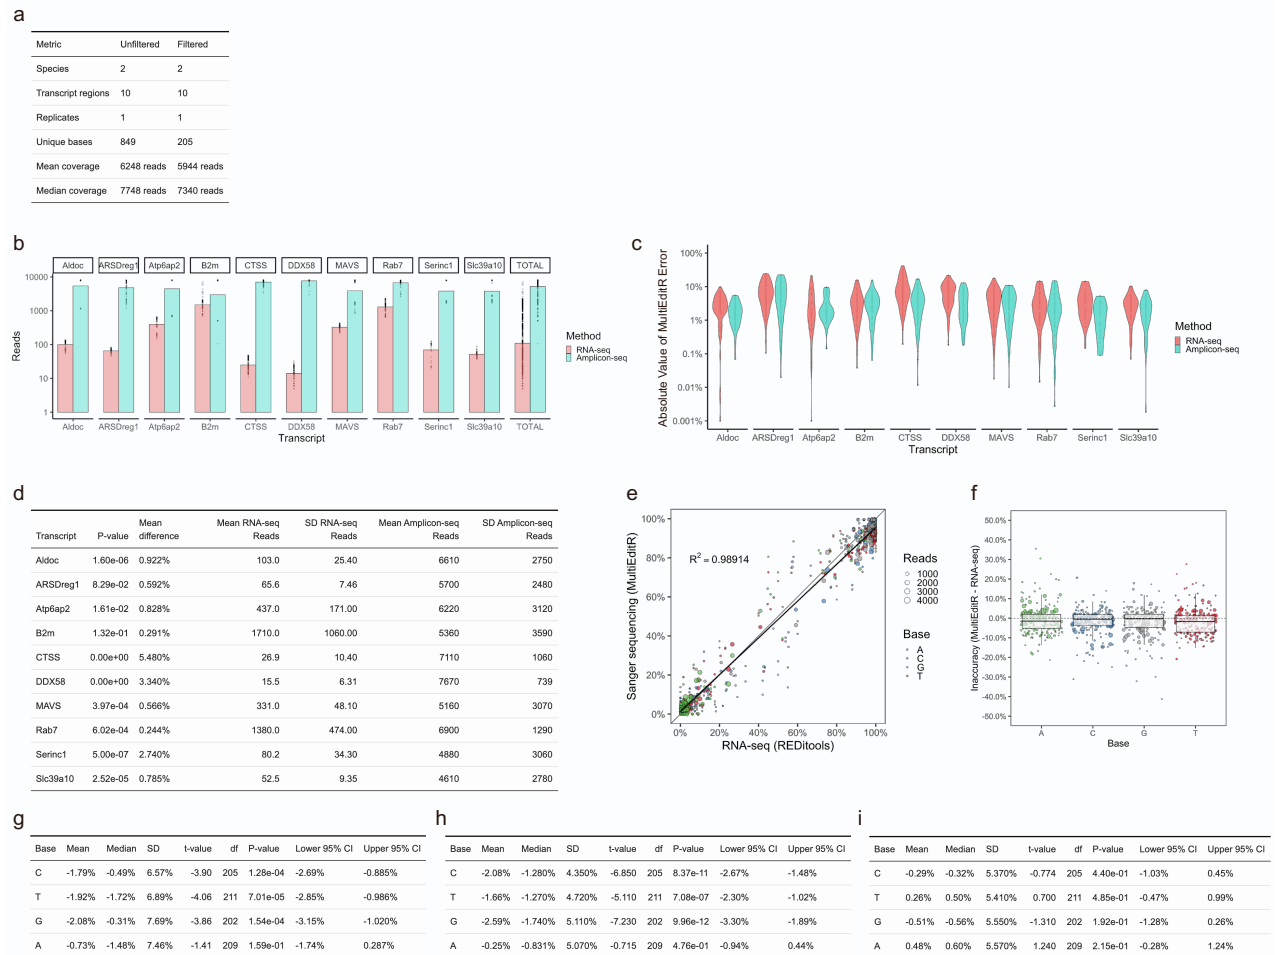

**Fig. S5 | Descriptive statistics, coverage and error of samples in the combined RNA-seq and Amplicon-seq data set.**

**a**, Descriptive statistics of samples in the combined data set. **b**, Barplots of read depth in each sample for RNA-seq and Amplicon-seq data for each transcript. Amplicon-seq read depth is higher for every transcript. **c**, Violin plots of absolute value of error in MultiEditR editing measurements minus REDIttools RNA-seq or Amplicon-seq editing measurements. **d**, Table comparison of RNA-seq to Amplicon-seq editing values for each transcript. **e-f**, Comparison of MultiEditR to RNA-seq measurements. Data is filtered on between 1% and 99% editing measured by Amplicon-seq. Coefficients of determination represent regression to the identity line. Dot size is proportional to read coverage at the base of interest in RNA-seq. **g**, Tables of Student's pairwise t-test results

between MultiEditR and RNA-seq. **h**, Tables of Student's pairwise t-test results between MultiEditR and Amplicon-seq. **i**, Tables of Student's pairwise t-test results between RNA-seq and Amplicon-seq.

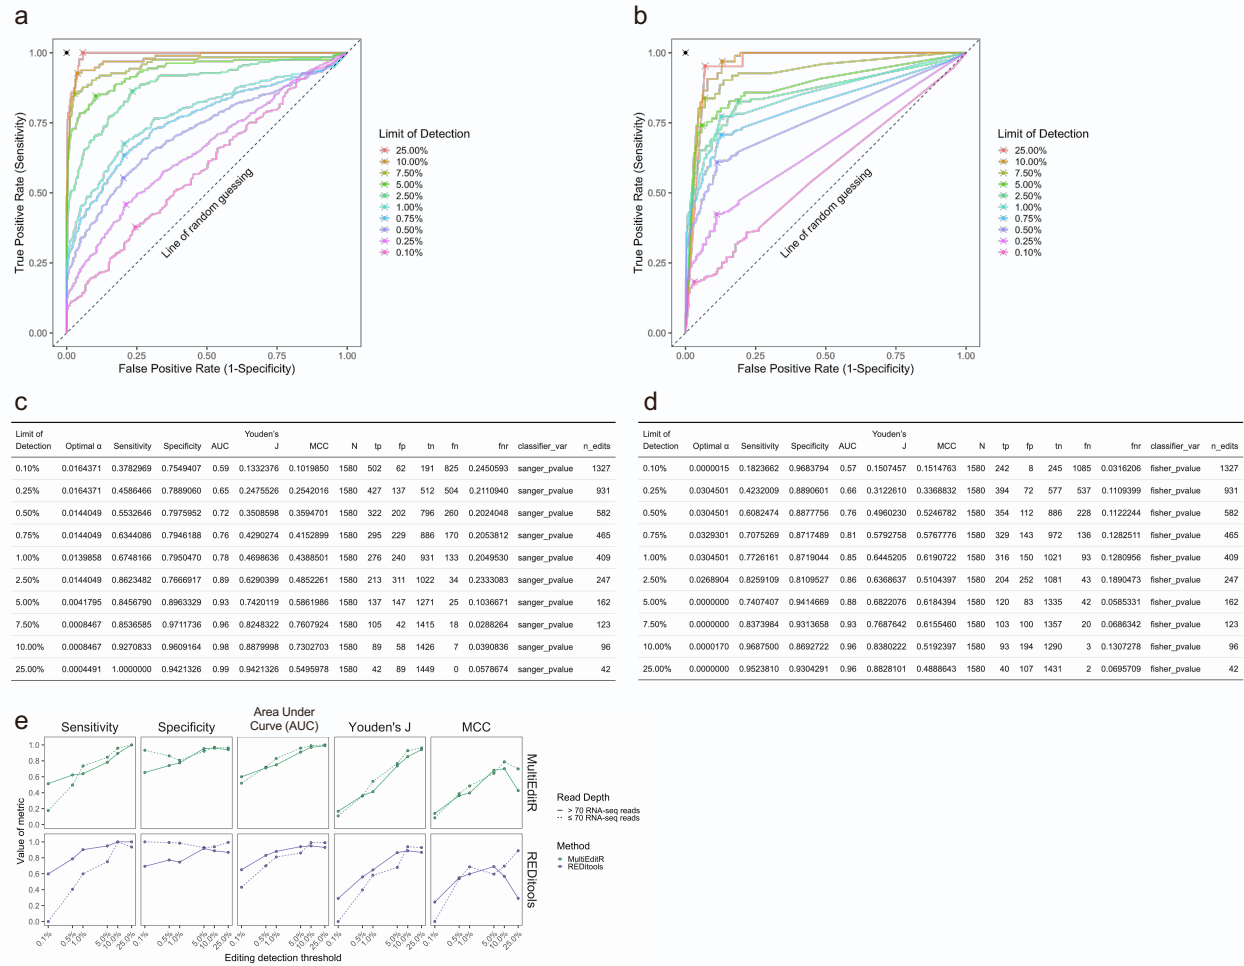

**Fig. S6 | Receiver Operating Characteristics (ROC) analysis of MultiEditR and REDIttools RNA-seq, compared to REDIttools Amplicon-seq.**

**a**, MultiEditR ROC across different limits of detection. Hashed points represent optimal cutpoint.

**b**, REDIttools RNA-seq ROC across different limits of detection. Hashed points represent optimal cutpoint.

**c**, MultiEditR ROC analysis parameter table across levels of detection. **d**, REDIttools RNA-seq ROC analysis parameter table across levels of detection.

**e**, Lineplots for ROC parameters for MultiEditR and REDIttools across limits of detection, broken up by regions that had high RNA seq coverage (>70 reads), and low RNA-seq coverage ( $\leq 70$  reads). MultiEditR is more robust in regions that have poor coverage in RNA-seq.

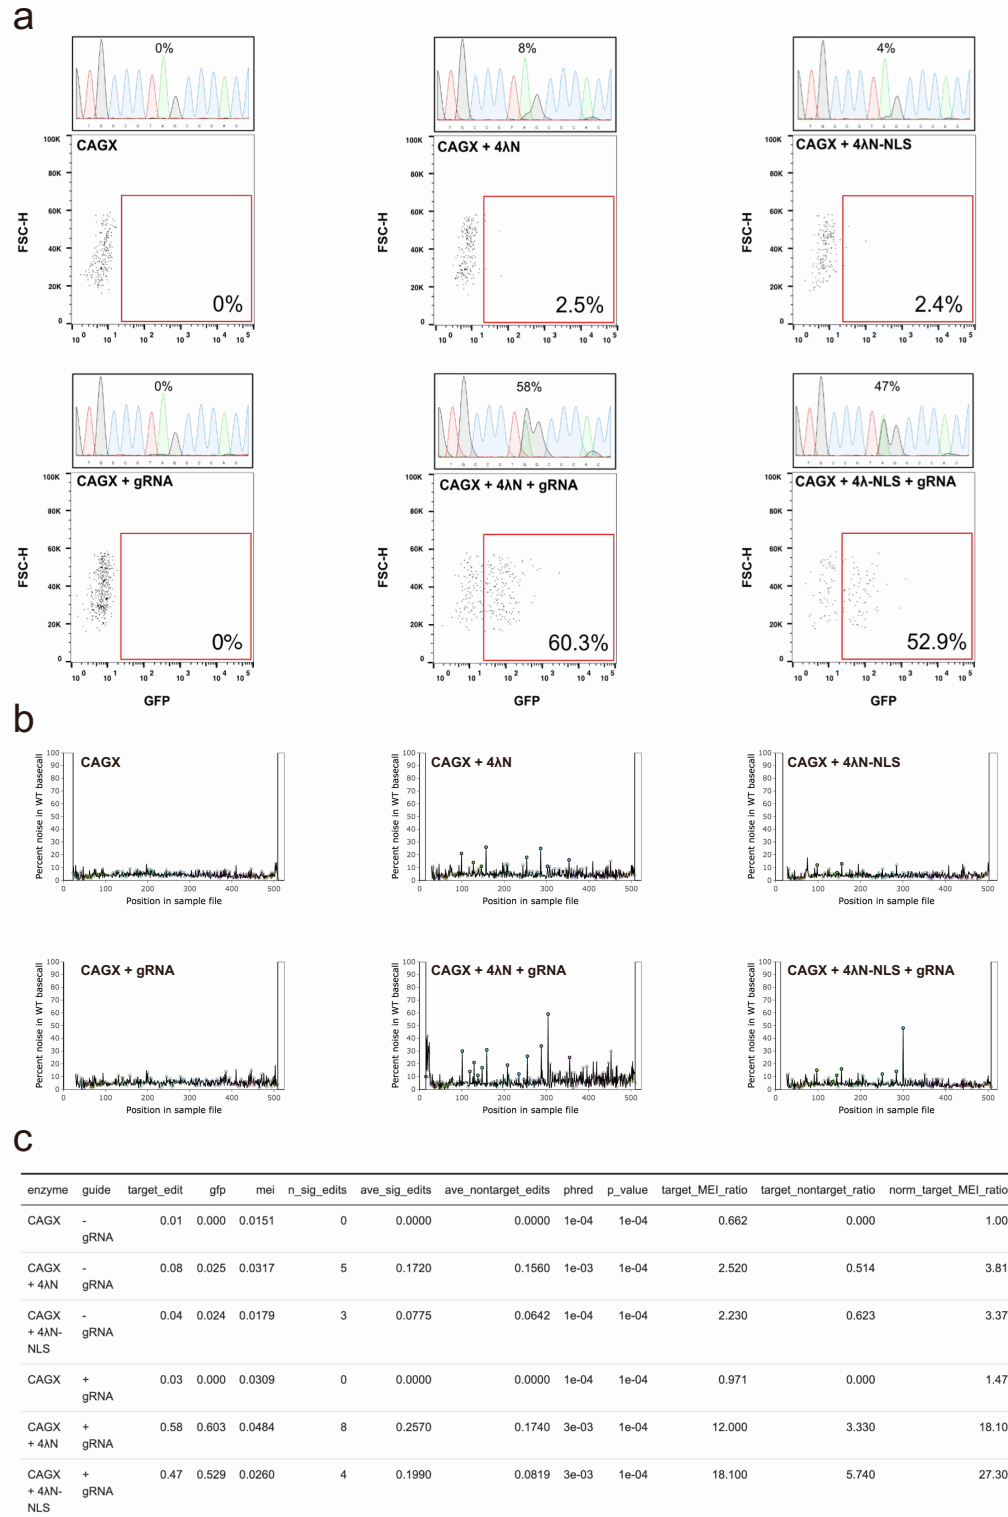

**Fig. S7 | Reactivation of eGFP by RNA targeted editing.**

**a**, FACS analysis for GFP positive cells after transfection with 4λN and 4λN-NLS in presence and absence of the gRNA to re-activate eGFP by RNA base-editing. The percentage in the plot represents the GFP+ cells of the mCherry+ cells detected by FACS. Above each FACS plot, it is shown A-to-G editing at position W58X for that sample; the percentage of editing is calculated by MultiEditR. **b**, Plots generated in MultiEditR showing the distribution of A-to-G editing along the sequenced region. From this plot appears evident that 4λN has a higher editing activity which leads to a more prominent RNA off-target effect both in presence and absence of the gRNA. **c**, MultiEditR parameters used in this analysis.
